# Supplementary material for: Economic burden of non-alcoholic steatohepatitis with significant fibrosis in Thailand
Source: PubMed Central journal article supplement (PMC7992785; doi:10.1186/s12876-021-01720-w), 2021-03-25
Supplement: 12876_2021_1720_MOESM1_ESM.pdf [file 12876_2021_1720_MOESM1_ESM.pdf]

**ELECTRONIC SUPPLEMENTARY MATERIAL****Economic Burden of Non-alcoholic Steatohepatitis with Significant Fibrosis in Thailand**

Pochamana Phisalprapa, M.D., Ph.D.<sup>1</sup>,

Ratthanon Prasitwarachot, M.Sc.<sup>2</sup>,

Chayanis Kositamongkol, Pharm.D.<sup>1</sup>,

Pranaidej Hengswat, B.Ec.<sup>3</sup>,

Weerachai Srivanichakorn, M.D.<sup>1</sup>,

Chaiwat Washirasaksiri, M.D., M.Sc.<sup>1</sup>,

Sombat Treeprasertsuk, M.D, Ph.D.<sup>4</sup>,

Phunchai Charatcharoenwitthaya, M.D.<sup>5</sup>,

Nathorn Chaiyakunapruk, Pharm.D., Ph.D.<sup>6,\*</sup>

<sup>1</sup>Division of Ambulatory Medicine, Department of Medicine, Faculty of Medicine Siriraj Hospital, Mahidol University, Bangkok, Thailand

<sup>2</sup>Department of Pharmacy Technicians, Sirindhorn College of Public Health Suphanburi, Suphanburi, Thailand

<sup>3</sup>Faculty of Medicine Siriraj Hospital, Mahidol University, Bangkok, Thailand

<sup>4</sup>Division of Gastroenterology, Department of Medicine, Faculty of Medicine, Chulalongkorn University, and King Chulalongkorn Memorial Hospital, Thai Red Cross, Bangkok, Thailand

<sup>5</sup>Division of Gastroenterology, Department of Medicine, Faculty of Medicine Siriraj Hospital, Mahidol University, Bangkok, Thailand

<sup>6</sup>Department of Pharmacotherapy, College of Pharmacy, University of Utah, Salt Lake City, UT, USA

**\*Corresponding Author**

Professor Nathorn Chaiyakunapruk Pharm.D., Ph.D.

Department of Pharmacotherapy, College of Pharmacy, University of Utah, Salt Lake City, UT, USA, 84112

Tel: (801) 585-3092; E-mail: nathorn.chaiyakunapruk@utah.edu

## Table of Contents

|                                                                                                                        |    |
|------------------------------------------------------------------------------------------------------------------------|----|
| <i>Appendix 1: Thai population</i> .....                                                                               | 3  |
| <i>Appendix 2: Age-specific mortality rate of Thai general population, NAFLD patients and cirrhosis patients</i> ..... | 5  |
| <i>Appendix 3: Prevalence of non-alcoholic fatty liver disease (NAFLD) in Thailand</i> .....                           | 9  |
| <i>Appendix 4: Prevalence of non-alcoholic steatohepatitis with significant fibrosis in Thailand</i> .....             | 17 |
| <i>Appendix 5: Estimated number of patients in advanced health state</i> .....                                         | 19 |
| <i>Appendix 6: The proportion of total costs by health state</i> .....                                                 | 21 |
| <i>Appendix 7: Probabilistic sensitivity analysis</i> .....                                                            | 22 |
| <i>References</i> .....                                                                                                | 24 |

## Appendix 1: Thai population

**Table S1** the number of Thai population, according to age and gender, and the total number of each age cohort [1]

| <b>Age</b> | <b>Male</b> | <b>Female</b> | <b>Total</b> | <b>Total per age group</b> |
|------------|-------------|---------------|--------------|----------------------------|
| 18         | 407,410     | 387,539       | 794,949      |                            |
| 19         | 428,108     | 409,373       | 837,481      |                            |
| 20         | 428,100     | 407,591       | 835,691      |                            |
| 21         | 449,438     | 436,784       | 886,222      |                            |
| 22         | 490,461     | 472,693       | 963,154      |                            |
| 23         | 497,807     | 482,834       | 980,641      |                            |
| 24         | 492,692     | 478,916       | 971,608      |                            |
| 25         | 477,384     | 462,048       | 939,432      |                            |
| 26         | 479,967     | 466,748       | 946,715      |                            |
| 27         | 487,328     | 474,480       | 961,808      |                            |
| 28         | 484,343     | 471,187       | 955,530      |                            |
| 29         | 476,896     | 466,389       | 943,285      |                            |
| 30         | 457,432     | 447,178       | 904,610      |                            |
| 31         | 447,350     | 438,088       | 885,438      |                            |
| 32         | 443,513     | 438,683       | 882,196      |                            |
| 33         | 458,528     | 453,769       | 912,297      |                            |
| 34         | 475,856     | 471,953       | 947,809      |                            |
| 35         | 477,725     | 475,699       | 953,424      |                            |
| 36         | 487,940     | 488,590       | 976,530      |                            |
| 37         | 504,394     | 506,744       | 1,011,138    |                            |
| 38         | 504,213     | 507,131       | 1,011,344    |                            |
| 39         | 514,384     | 518,090       | 1,032,474    | 20,533,776                 |
| 40         | 513,723     | 521,065       | 1,034,788    |                            |
| 41         | 494,954     | 506,364       | 1,001,318    |                            |
| 42         | 518,230     | 532,860       | 1,051,090    |                            |
| 43         | 509,887     | 528,727       | 1,038,614    |                            |
| 44         | 498,965     | 520,056       | 1,019,021    |                            |
| 45         | 505,658     | 531,351       | 1,037,009    |                            |
| 46         | 492,874     | 521,850       | 1,014,724    |                            |
| 47         | 505,670     | 540,850       | 1,046,520    |                            |
| 48         | 510,221     | 551,547       | 1,061,768    |                            |
| 49         | 498,865     | 538,998       | 1,037,863    |                            |
| 50         | 487,720     | 533,642       | 1,021,362    |                            |
| 51         | 502,465     | 552,837       | 1,055,302    |                            |
| 52         | 479,479     | 526,837       | 1,006,316    |                            |
| 53         | 464,854     | 518,559       | 983,413      |                            |
| 54         | 469,474     | 524,592       | 994,066      |                            |
| 55         | 463,717     | 523,829       | 987,546      |                            |
| 56         | 435,160     | 487,993       | 923,153      |                            |
| 57         | 423,220     | 474,424       | 897,644      |                            |
| 58         | 401,832     | 453,711       | 855,543      |                            |
| 59         | 396,472     | 455,880       | 852,352      | 19,919,412                 |
| 60         | 378,141     | 434,683       | 812,824      |                            |

| <b>Age</b>   | <b>Male</b>       | <b>Female</b>     | <b>Total</b>      | <b>Total per age group</b> |
|--------------|-------------------|-------------------|-------------------|----------------------------|
| 61           | 343,769           | 401,080           | 744,849           |                            |
| 62           | 329,635           | 386,042           | 715,677           |                            |
| 63           | 302,950           | 352,396           | 655,346           |                            |
| 64           | 279,663           | 329,940           | 609,603           |                            |
| 65           | 282,467           | 340,058           | 622,525           |                            |
| 66           | 259,791           | 314,332           | 574,123           |                            |
| 67           | 253,375           | 306,427           | 559,802           |                            |
| 68           | 235,748           | 287,611           | 523,359           |                            |
| 69           | 221,683           | 273,663           | 495,346           |                            |
| 70           | 211,843           | 264,598           | 476,441           |                            |
| 71           | 187,295           | 232,597           | 419,892           |                            |
| 72           | 167,531           | 209,796           | 377,327           |                            |
| 73           | 150,727           | 191,750           | 342,477           |                            |
| 74           | 132,398           | 171,077           | 303,475           |                            |
| 75           | 125,640           | 161,102           | 286,742           |                            |
| 76           | 114,638           | 150,711           | 265,349           |                            |
| 77           | 107,104           | 143,320           | 250,424           |                            |
| 78           | 103,923           | 142,025           | 245,948           |                            |
| 79           | 88,761            | 124,883           | 213,644           |                            |
| 80           | 88,192            | 124,616           | 212,808           |                            |
| 81           | 82,047            | 118,092           | 200,139           |                            |
| 82           | 71,178            | 106,586           | 177,764           |                            |
| 83           | 63,712            | 96,679            | 160,391           |                            |
| 84           | 55,882            | 87,654            | 143,536           |                            |
| 85           | 48,757            | 75,923            | 124,680           |                            |
| 86           | 42,656            | 69,113            | 111,769           |                            |
| 87           | 37,354            | 60,627            | 97,981            |                            |
| 88           | 29,752            | 50,663            | 80,415            |                            |
| 89           | 24,791            | 42,492            | 67,283            |                            |
| 90           | 20,387            | 35,637            | 56,024            |                            |
| 91           | 16,973            | 29,477            | 46,450            |                            |
| 92           | 13,834            | 24,363            | 38,197            |                            |
| 93           | 10,176            | 17,928            | 28,104            |                            |
| 94           | 8,105             | 14,156            | 22,261            |                            |
| 95           | 5,953             | 9,935             | 15,888            |                            |
| 96           | 4,987             | 7,834             | 12,821            |                            |
| 97           | 3,947             | 6,134             | 10,081            |                            |
| 98           | 3,366             | 4,960             | 8,326             |                            |
| 99           | 2,932             | 4,067             | 6,999             |                            |
| ≥ 100        | 8,234             | 10,735            | 18,969            | 11,136,059                 |
| <b>Total</b> | <b>24,865,006</b> | <b>26,724,241</b> | <b>51,589,247</b> | <b>51,589,247</b>          |

## Appendix 2: Age-specific mortality rate of Thai general population, NAFLD patients and cirrhosis patients

Age-specific mortality rate (ASMR) of Thai general population was based on WHO life table 2016 [2]. ASMRs of NAFLD and cirrhosis patients were calculated by multiplying hazard ratio by ASMR of general population, as shown in the equations below.

$$\text{ASMR of NAFLD patients} = 1.29 \times \text{ASMR of general population}$$

$$\text{ASMR of cirrhosis patients} = 3.13 \times \text{ASMR of general population}$$

The hazard ratios of NAFLD and cirrhosis for overall death were based on the study of Ekstedt *et al.* [3]. This cohort study was conducted in Sweden and was intended to determine the disease-specific mortality in NAFLD patients and to evaluate the NAFLD Activity score (NAS) and fibrosis stage as prognostic markers for overall and disease-specific mortality. All 229 participants were confirmed with NAFLD by liver biopsy and had been followed-up for up to 33 years. The authors reported that the hazard ratio of NAFLD for overall mortality was 1.29 (95% CI: 1.04-1.59,  $p = 0.020$ ), while that for cirrhosis was 3.13 (95% CI: 1.08-9.12,  $p = 0.036$ ).

The ASMRs of NAFLD and cirrhosis of the Thai adult population aged 18 to 100 are shown in Table S2.

**Table S2** Age-specific mortality rates and probability of deaths of Thai population, NAFLD patients and cirrhosis patients

| Age (years) | ASMR of general population | Probability of death of general population | ASMR of NAFLD | Probability of death of NAFLD | ASMR of cirrhosis | Probability of death of cirrhosis |
|-------------|----------------------------|--------------------------------------------|---------------|-------------------------------|-------------------|-----------------------------------|
| 18          | 0.0010                     | 0.0010                                     | 0.0013        | 0.0013                        | 0.0032            | 0.0032                            |
| 19          | 0.0010                     | 0.0010                                     | 0.0013        | 0.0013                        | 0.0032            | 0.0032                            |
| 20          | 0.0015                     | 0.0015                                     | 0.0020        | 0.0019                        | 0.0047            | 0.0047                            |
| 21          | 0.0015                     | 0.0015                                     | 0.0019        | 0.0019                        | 0.0047            | 0.0047                            |
| 22          | 0.0015                     | 0.0015                                     | 0.0019        | 0.0019                        | 0.0047            | 0.0047                            |
| 23          | 0.0015                     | 0.0015                                     | 0.0019        | 0.0019                        | 0.0047            | 0.0047                            |
| 24          | 0.0015                     | 0.0015                                     | 0.0019        | 0.0019                        | 0.0047            | 0.0047                            |
| 25          | 0.0020                     | 0.0020                                     | 0.0026        | 0.0026                        | 0.0063            | 0.0063                            |
| 26          | 0.0020                     | 0.0020                                     | 0.0026        | 0.0026                        | 0.0063            | 0.0063                            |

| <b>Age (years)</b> | <b>ASMR of general population</b> | <b>Probability of death of general population</b> | <b>ASMR of NAFLD</b> | <b>Probability of death of NAFLD</b> | <b>ASMR of cirrhosis</b> | <b>Probability of death of cirrhosis</b> |
|--------------------|-----------------------------------|---------------------------------------------------|----------------------|--------------------------------------|--------------------------|------------------------------------------|
| 27                 | 0.0020                            | 0.0020                                            | 0.0026               | 0.0026                               | 0.0063                   | 0.0063                                   |
| 28                 | 0.0020                            | 0.0020                                            | 0.0026               | 0.0026                               | 0.0063                   | 0.0063                                   |
| 29                 | 0.0020                            | 0.0020                                            | 0.0026               | 0.0026                               | 0.0063                   | 0.0063                                   |
| 30                 | 0.0025                            | 0.0025                                            | 0.0032               | 0.0032                               | 0.0079                   | 0.0078                                   |
| 31                 | 0.0025                            | 0.0025                                            | 0.0032               | 0.0032                               | 0.0079                   | 0.0078                                   |
| 32                 | 0.0025                            | 0.0025                                            | 0.0032               | 0.0032                               | 0.0079                   | 0.0078                                   |
| 33                 | 0.0025                            | 0.0025                                            | 0.0032               | 0.0032                               | 0.0078                   | 0.0078                                   |
| 34                 | 0.0025                            | 0.0025                                            | 0.0032               | 0.0032                               | 0.0078                   | 0.0078                                   |
| 35                 | 0.0025                            | 0.0025                                            | 0.0032               | 0.0032                               | 0.0078                   | 0.0078                                   |
| 36                 | 0.0025                            | 0.0025                                            | 0.0032               | 0.0032                               | 0.0078                   | 0.0078                                   |
| 37                 | 0.0025                            | 0.0025                                            | 0.0032               | 0.0032                               | 0.0078                   | 0.0078                                   |
| 38                 | 0.0025                            | 0.0025                                            | 0.0032               | 0.0032                               | 0.0078                   | 0.0078                                   |
| 39                 | 0.0025                            | 0.0025                                            | 0.0032               | 0.0032                               | 0.0078                   | 0.0078                                   |
| 40                 | 0.0035                            | 0.0035                                            | 0.0045               | 0.0045                               | 0.0109                   | 0.0109                                   |
| 41                 | 0.0035                            | 0.0035                                            | 0.0045               | 0.0045                               | 0.0109                   | 0.0108                                   |
| 42                 | 0.0035                            | 0.0035                                            | 0.0045               | 0.0045                               | 0.0109                   | 0.0108                                   |
| 43                 | 0.0035                            | 0.0035                                            | 0.0045               | 0.0045                               | 0.0109                   | 0.0108                                   |
| 44                 | 0.0035                            | 0.0035                                            | 0.0045               | 0.0045                               | 0.0109                   | 0.0108                                   |
| 45                 | 0.0045                            | 0.0045                                            | 0.0058               | 0.0057                               | 0.0140                   | 0.0139                                   |
| 46                 | 0.0045                            | 0.0044                                            | 0.0057               | 0.0057                               | 0.0140                   | 0.0139                                   |
| 47                 | 0.0044                            | 0.0044                                            | 0.0057               | 0.0057                               | 0.0139                   | 0.0138                                   |
| 48                 | 0.0044                            | 0.0044                                            | 0.0057               | 0.0057                               | 0.0139                   | 0.0138                                   |
| 49                 | 0.0044                            | 0.0044                                            | 0.0057               | 0.0057                               | 0.0139                   | 0.0138                                   |
| 50                 | 0.0059                            | 0.0059                                            | 0.0076               | 0.0076                               | 0.0185                   | 0.0183                                   |
| 51                 | 0.0059                            | 0.0059                                            | 0.0076               | 0.0076                               | 0.0185                   | 0.0183                                   |
| 52                 | 0.0059                            | 0.0059                                            | 0.0076               | 0.0076                               | 0.0185                   | 0.0183                                   |
| 53                 | 0.0059                            | 0.0059                                            | 0.0076               | 0.0076                               | 0.0184                   | 0.0183                                   |
| 54                 | 0.0059                            | 0.0059                                            | 0.0076               | 0.0076                               | 0.0184                   | 0.0183                                   |
| 55                 | 0.0083                            | 0.0083                                            | 0.0108               | 0.0107                               | 0.0261                   | 0.0258                                   |

| <b>Age (years)</b> | <b>ASMR of general population</b> | <b>Probability of death of general population</b> | <b>ASMR of NAFLD</b> | <b>Probability of death of NAFLD</b> | <b>ASMR of cirrhosis</b> | <b>Probability of death of cirrhosis</b> |
|--------------------|-----------------------------------|---------------------------------------------------|----------------------|--------------------------------------|--------------------------|------------------------------------------|
| 56                 | 0.0084                            | 0.0083                                            | 0.0108               | 0.0107                               | 0.0262                   | 0.0258                                   |
| 57                 | 0.0084                            | 0.0083                                            | 0.0108               | 0.0107                               | 0.0262                   | 0.0258                                   |
| 58                 | 0.0083                            | 0.0083                                            | 0.0108               | 0.0107                               | 0.0261                   | 0.0258                                   |
| 59                 | 0.0083                            | 0.0083                                            | 0.0107               | 0.0107                               | 0.0261                   | 0.0257                                   |
| 60                 | 0.0118                            | 0.0117                                            | 0.0152               | 0.0151                               | 0.0369                   | 0.0362                                   |
| 61                 | 0.0118                            | 0.0117                                            | 0.0152               | 0.0151                               | 0.0368                   | 0.0362                                   |
| 62                 | 0.0118                            | 0.0117                                            | 0.0152               | 0.0151                               | 0.0368                   | 0.0362                                   |
| 63                 | 0.0118                            | 0.0117                                            | 0.0152               | 0.0151                               | 0.0369                   | 0.0362                                   |
| 64                 | 0.0118                            | 0.0117                                            | 0.0152               | 0.0150                               | 0.0368                   | 0.0361                                   |
| 65                 | 0.0181                            | 0.0179                                            | 0.0233               | 0.0231                               | 0.0566                   | 0.0550                                   |
| 66                 | 0.0181                            | 0.0179                                            | 0.0233               | 0.0230                               | 0.0566                   | 0.0550                                   |
| 67                 | 0.0181                            | 0.0179                                            | 0.0233               | 0.0230                               | 0.0566                   | 0.0550                                   |
| 68                 | 0.0181                            | 0.0179                                            | 0.0233               | 0.0230                               | 0.0565                   | 0.0549                                   |
| 69                 | 0.0180                            | 0.0179                                            | 0.0233               | 0.0230                               | 0.0564                   | 0.0549                                   |
| 70                 | 0.0283                            | 0.0279                                            | 0.0366               | 0.0359                               | 0.0887                   | 0.0849                                   |
| 71                 | 0.0284                            | 0.0280                                            | 0.0366               | 0.0359                               | 0.0887                   | 0.0849                                   |
| 72                 | 0.0283                            | 0.0279                                            | 0.0365               | 0.0359                               | 0.0887                   | 0.0848                                   |
| 73                 | 0.0283                            | 0.0279                                            | 0.0365               | 0.0358                               | 0.0885                   | 0.0847                                   |
| 74                 | 0.0282                            | 0.0278                                            | 0.0364               | 0.0358                               | 0.0884                   | 0.0846                                   |
| 75                 | 0.0444                            | 0.0435                                            | 0.0573               | 0.0557                               | 0.1391                   | 0.1299                                   |
| 76                 | 0.0443                            | 0.0434                                            | 0.0572               | 0.0556                               | 0.1388                   | 0.1296                                   |
| 77                 | 0.0443                            | 0.0433                                            | 0.0571               | 0.0555                               | 0.1386                   | 0.1294                                   |
| 78                 | 0.0442                            | 0.0432                                            | 0.0570               | 0.0554                               | 0.1383                   | 0.1292                                   |
| 79                 | 0.0441                            | 0.0431                                            | 0.0568               | 0.0553                               | 0.1379                   | 0.1288                                   |
| 80                 | 0.0743                            | 0.0716                                            | 0.0958               | 0.0914                               | 0.2325                   | 0.2075                                   |
| 81                 | 0.0742                            | 0.0715                                            | 0.0957               | 0.0913                               | 0.2322                   | 0.2072                                   |
| 82                 | 0.0740                            | 0.0713                                            | 0.0955               | 0.0911                               | 0.2316                   | 0.2068                                   |
| 83                 | 0.0739                            | 0.0713                                            | 0.0954               | 0.0910                               | 0.2314                   | 0.2066                                   |
| 84                 | 0.0738                            | 0.0711                                            | 0.0952               | 0.0908                               | 0.2310                   | 0.2062                                   |

| <b>Age (years)</b> | <b>ASMR of general population</b> | <b>Probability of death of general population</b> | <b>ASMR of NAFLD</b> | <b>Probability of death of NAFLD</b> | <b>ASMR of cirrhosis</b> | <b>Probability of death of cirrhosis</b> |
|--------------------|-----------------------------------|---------------------------------------------------|----------------------|--------------------------------------|--------------------------|------------------------------------------|
| 85                 | 0.1502                            | 0.1395                                            | 0.1938               | 0.1762                               | 0.4702                   | 0.3751                                   |
| 86                 | 0.1500                            | 0.1393                                            | 0.1935               | 0.1759                               | 0.4695                   | 0.3747                                   |
| 87                 | 0.1500                            | 0.1393                                            | 0.1935               | 0.1759                               | 0.4695                   | 0.3747                                   |
| 88                 | 0.1498                            | 0.1391                                            | 0.1932               | 0.1757                               | 0.4688                   | 0.3742                                   |
| 89                 | 0.1497                            | 0.1391                                            | 0.1932               | 0.1757                               | 0.4687                   | 0.3742                                   |
| 90                 | 0.1496                            | 0.1390                                            | 0.1930               | 0.1755                               | 0.4684                   | 0.3740                                   |
| 91                 | 0.1497                            | 0.1390                                            | 0.1931               | 0.1756                               | 0.4685                   | 0.3740                                   |
| 92                 | 0.1496                            | 0.1390                                            | 0.1930               | 0.1755                               | 0.4683                   | 0.3739                                   |
| 93                 | 0.1496                            | 0.1390                                            | 0.1930               | 0.1755                               | 0.4683                   | 0.3739                                   |
| 94                 | 0.1496                            | 0.1390                                            | 0.1930               | 0.1756                               | 0.4684                   | 0.3740                                   |
| 95                 | 0.1499                            | 0.1392                                            | 0.1933               | 0.1758                               | 0.4691                   | 0.3744                                   |
| 96                 | 0.1502                            | 0.1394                                            | 0.1937               | 0.1761                               | 0.4700                   | 0.3750                                   |
| 97                 | 0.1502                            | 0.1395                                            | 0.1938               | 0.1762                               | 0.4702                   | 0.3751                                   |
| 98                 | 0.1505                            | 0.1397                                            | 0.1941               | 0.1765                               | 0.4710                   | 0.3756                                   |
| 99                 | 0.1508                            | 0.1400                                            | 0.1945               | 0.1768                               | 0.4720                   | 0.3762                                   |
| ≥ 100 <sup>a</sup> | 0.1511                            | 1.0000                                            | 0.1949               | 1.0000                               | 0.4730                   | 1.0000                                   |

ASMR, age-specific mortality rate; NAFLD, non-alcoholic fatty liver disease

<sup>a</sup>We assumed that no one lives longer than 100 years.



### Appendix 3: Prevalence of non-alcoholic fatty liver disease (NAFLD) in Thailand

#### Characteristics of studies included for calculating the prevalence of NAFLD in Thailand

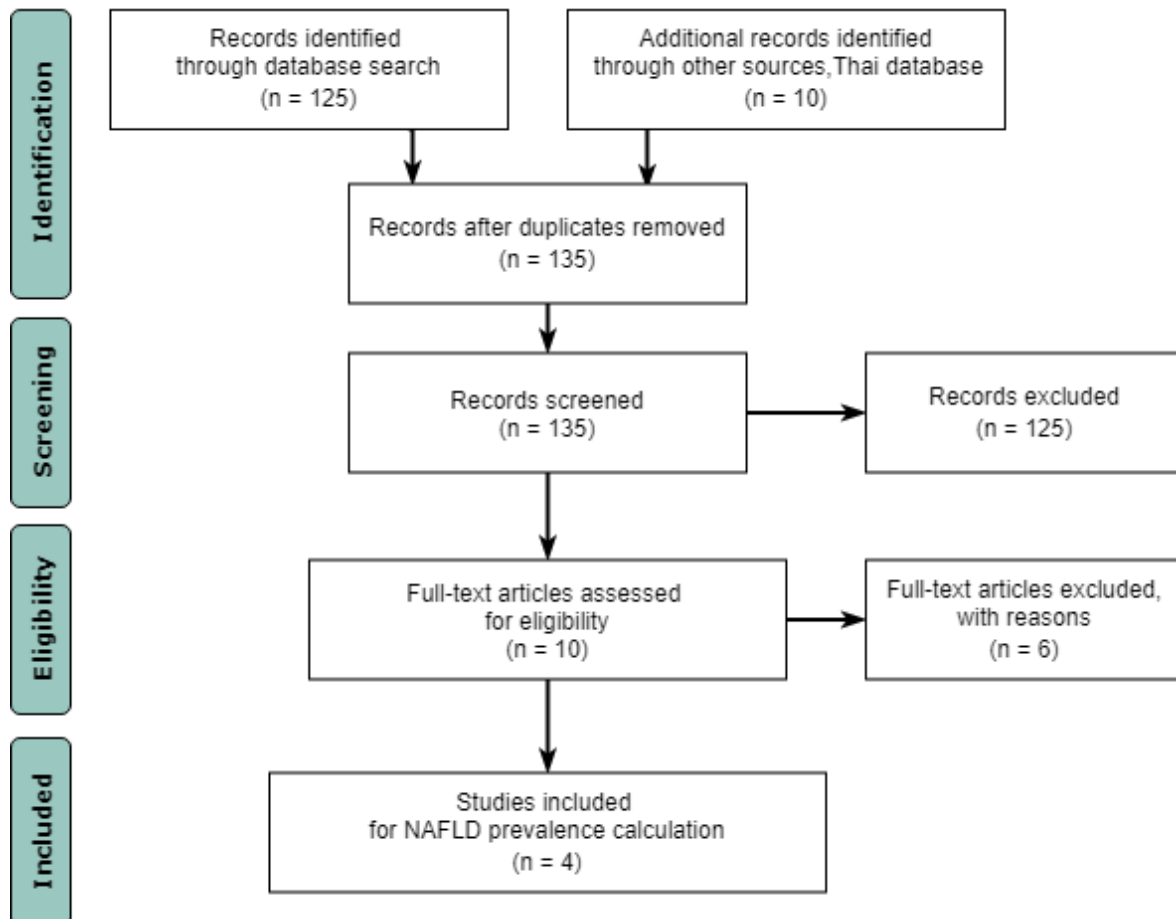

**Figure S1** PRISMA diagram of included and excluded studies for calculating the prevalence of NAFLD in Thailand

NAFLD, non-alcoholic fatty liver disease

To identify the prevalence of non-alcoholic fatty liver in Thailand, a literature search was performed in PubMed. The search terms “prevalence”, “NAFLD”, “nonalcoholic fatty liver disease”, “Thailand” and “Thai” were used to identify relevant articles published in peer-reviewed journals published before 31 January 2020. One hundred and twenty-five articles were found. In order to collect more information, a search using search terms in the Thai language was also performed in Google Scholar, Thai Journal Online, and ThaiLIS; ten articles were found. After the duplicates were removed and the remaining articles were screened, ten articles were eligible for full-text assessment (Fig S1).

Udompornmongkol *et al.* [4] conducted a study at Detudom Royal Crown Prince Hospital, Ubon Ratchathani, Northeastern Thailand, on 300 participants with an average age of 52.35 years and an average BMI of 24.78 kg/mg<sup>2</sup>. They reported that the prevalence of ultrasound-diagnosed non-alcoholic fatty liver disease (NAFLD) was 46%.

A study by Vanduangden *et al.* [5] was conducted at King Chulalongkorn Memorial Hospital on 161 subjects. All were examined with controlled attenuation parameter with transient elastography (CAP-TE). The study revealed that 99 out of 161 participants (61.5%) had NAFLD.

Ekpanyapong *et al.* [6] used CAP-TE to evaluate the prevalence and risk factors of NAFLD and liver fibrosis in 180 type 2 diabetic patients with normal serum aminotransferase. The results showed that the prevalence of NAFLD was 82.8%.

Another study aimed to identify the prevalence of NAFLD and significant hepatic fibrosis in diabetic patients. Conducted by Sobhonslidsuk *et al.* [7], the study investigated 137 diabetic patients identified with NAFLD by CAP-TE. The prevalence of NAFLD from this study was 60.16%.

A study entitled “Prevalence and Risk Factors of Non-Alcoholic Fatty Liver Disease in Asian Individuals with Metabolic Syndrome” by Phisalprapa *et al.* [8] investigated the prevalence of NAFLD in 509 patients. The research revealed that, overall, 67% were diagnosed with NAFLD; of these, 30% had a mild fatty liver, and 37% had a moderate to severe fatty liver.

Nevertheless, we believe that the prevalence of NAFLD increases with age, and this was considered to affect the accuracy of our analysis. Consequently, studies by Udompornmongkol *et al.*, Vanduangden *et al.*, Ekpanyapong *et al.*, Sobhonslidsuk *et al.*, and Phisalprapa *et al.* [4-8] were excluded since those studies did not report the age-specific NAFLD prevalences. Additionally, a study by Summart *et al.* [9], which reported a prevalence of 21.85% for ultrasound-diagnosed NAFLD among 34,709 participants, was also excluded

since the population of this study was the same population as the study conducted by Thinkhamrop *et al.* [10], which was already included.

Hence, of the 10 studies, four met the inclusion criteria and were utilised for the meta-analysis to determine the pooled prevalence of NAFLD in the Thai population. The characteristics of the included studies are presented in Table S3.

**Table S3** Characteristics of studies included in the meta-analysis for pooled prevalence of NAFLD in the general Thai population

| Characteristic                        | Author, publication year        |                                                                      |                                                                                    |                                          |
|---------------------------------------|---------------------------------|----------------------------------------------------------------------|------------------------------------------------------------------------------------|------------------------------------------|
|                                       | Pitug <i>et al.</i> , 2017 [11] | Leelaprasart <i>et al.</i> , 2015 [12]                               | Thinkhamrop <i>et al.</i> , 2015 [10]                                              | Rattanangamkul <i>et al.</i> , 2017 [13] |
| Setting (hospital, province)          | Borabue Hospital, Maha Sarakham | Krabi Hospital, Krabi                                                | CASCAP (9 tertiary care hospitals)                                                 | Phayathai Hospital, Bangkok              |
| Region                                | Northeast                       | South                                                                | Northeast                                                                          | Central                                  |
| Study design                          | cross-sectional                 | cross-sectional (retrospective review)                               | population-based, prospective cohort, survey study                                 | cross-sectional (retrospective review)   |
| Sample size                           | 329                             | 720                                                                  | 45,263                                                                             | 4,471                                    |
| Characteristics of participants       |                                 |                                                                      |                                                                                    |                                          |
| Age (years) <sup>a</sup>              | 55.5±8.6                        | 52.64±16.42                                                          | 53.46±9.25                                                                         | 45                                       |
| Male (%)                              | 34.65%                          | 41.67%                                                               | 42.3%                                                                              | 48.32%                                   |
| BMI (kg/m <sup>2</sup> ) <sup>b</sup> | 24.09                           | NA                                                                   | NA                                                                                 | 24.77                                    |
| Overweight/<br>Obesity <sup>c</sup>   | 60.79%                          | 27.08%                                                               | NA                                                                                 | 10.46%                                   |
| With comorbidities                    | 23.10%                          | HT: 19.44%<br>T2DM: 15.83%<br>DLP: 16.53%<br>Central obesity: 22.08% | CCA: 35.1%<br>Smoking: 23.1%<br>Alcohol consumption <sup>d</sup> : 43.8%<br>HB: 2% | 15.95%<br>(T2DM, HT, DLP, others)        |

| Characteristic                         | Author, publication year        |                                        |                                       |                                          |
|----------------------------------------|---------------------------------|----------------------------------------|---------------------------------------|------------------------------------------|
|                                        | Pitug <i>et al.</i> , 2017 [11] | Leelaprasart <i>et al.</i> , 2015 [12] | Thinkhamrop <i>et al.</i> , 2015 [10] | Rattanangamkul <i>et al.</i> , 2017 [13] |
|                                        |                                 |                                        | HC: 0.2%<br>HT: 2.9%                  |                                          |
| NAFLD diagnosis method                 | ultrasound                      | ultrasound                             | ultrasound                            | ultrasound                               |
| NAFLD prevalence, regarding age groups |                                 |                                        |                                       |                                          |
| 20-39 years                            | 0/0                             | 31/173<br>(17.92%)                     | 0/0                                   | 498/1,271<br>(39.18%)                    |
| 40-49 years                            | 29/91<br>(31.87%)               | 96/316<br>(30.38%)                     | 3,516/17,756<br>(19.80%)              | 926/2,042<br>(45.35%)                    |
| 50-59 years                            | 58/137<br>(42.34%)              |                                        | 3,901/16,204<br>(24.07%)              | 790/1,458<br>(54.18%)                    |
| ≥ 60 years                             | 37/101<br>(36.63%)              | 50/231<br>(21.65%)                     | 2,227/11,303<br>(19.70%)              | 0/0                                      |
| Overall                                | 124/329 (37.69%)                | 177/720<br>(24.58%)                    | 9,644/45,263<br>(21.30%)              | 2,214/4,771<br>(46.41%)                  |

BMI, body mass index; CCA, cholangiocarcinoma; CASCAP, the Cholangiocarcinoma Screening and Care Program; DLP, dyslipidaemia; HB, hepatitis B infection; HC, hepatitis C infection; HT, hypertension; NA, not applicable; NAFLD, non-alcoholic fatty liver disease; T2DM, type 2 diabetes mellitus

<sup>a</sup>When the average age of the cohort was not reported, it was assumed by using the sum of the median age multiplied by the number of participants

in each age group, divided by the total number of participants, as shown in the equation below. If the maximum limit of the age range was unknown, the minimum age, regarding age range, would be used instead of median age.

$$\text{Average age} = \frac{\sum(\text{median age} \times \text{number of participant in each age group})}{\text{total number of participants}}$$

<sup>b</sup>Average BMI was also assumed using the same method as average age when it was not reported.

<sup>c</sup>Cutoff value of BMI for indicating overweight/obesity was different in each study. Pitug *et al.* [11] used BMI  $\geq 23$  kg/m<sup>2</sup> to indicate being overweight. Leelaprasart *et al.* [12] used BMI  $\geq 27$  kg/m<sup>2</sup> and  $\geq 25$  kg/m<sup>2</sup> to indicate obesity in men and women, respectively. Rattanangamkul *et al.* [13] used BMI cut-off at 30 kg/m<sup>2</sup> to indicate obesity.

<sup>d</sup>CASCAP did not report the amount of alcohol consumption of the participants. Although the effects of alcohol consumption on non-alcoholic fatty liver disease remain controversial, according to the crude analysis of this study, the author reported that alcohol was neither a protective nor a risk factor. In addition, a study by Tajima *et al.* suggested that the association of alcohol consumption with fatty liver prevalence was non-linear [14]. These may imply that alcohol intake has less effect on fatty liver prevalence. Therefore, we included the NAFLD prevalence from this study in the meta-analysis.

### Result of pooled prevalence of NAFLD in Thailand

The pooled prevalence of NAFLD was pooled using a random-effects model by Stata Statistical Software: Release 14 (StataCorp LP, College Station, TX, USA).

**Table S4** Pooled prevalence of NAFLD in Thailand, classified by age group

| Age group (years) | NAFLD prevalence | 95% confidence interval |
|-------------------|------------------|-------------------------|
| 20-39             | 35.34%           | 32.91%–37.77%           |
| 40-59             | 34.84%           | 17.13%–52.56%           |
| ≥ 60              | 24.43%           | 17.39%–31.50%           |

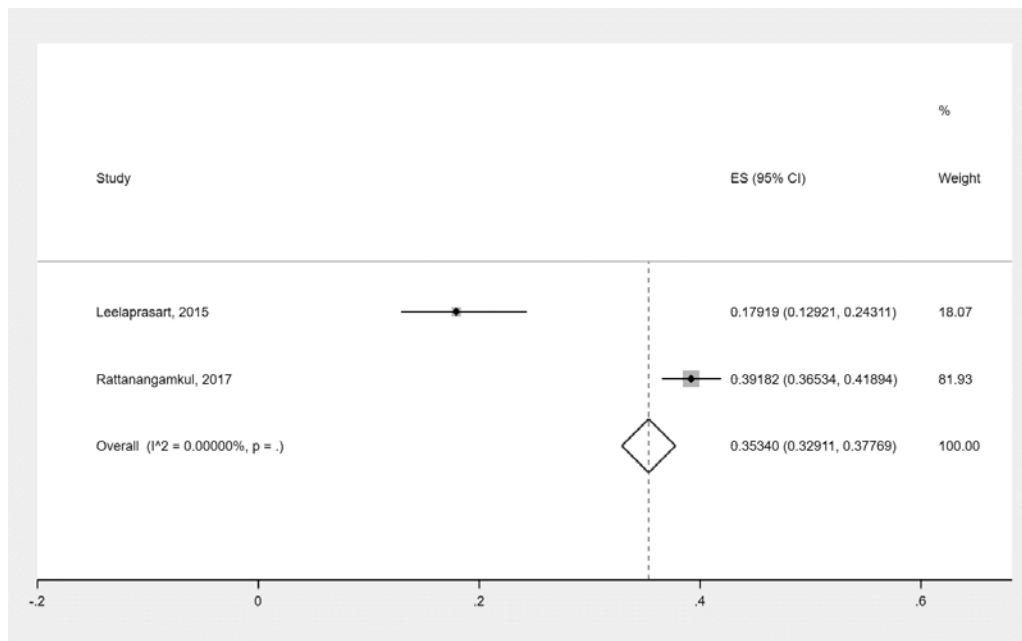

**Figure S2** Prevalence of NAFLD in Thai general population aged 20–39 years

ES, effect size; NAFLD, non-alcoholic fatty liver disease

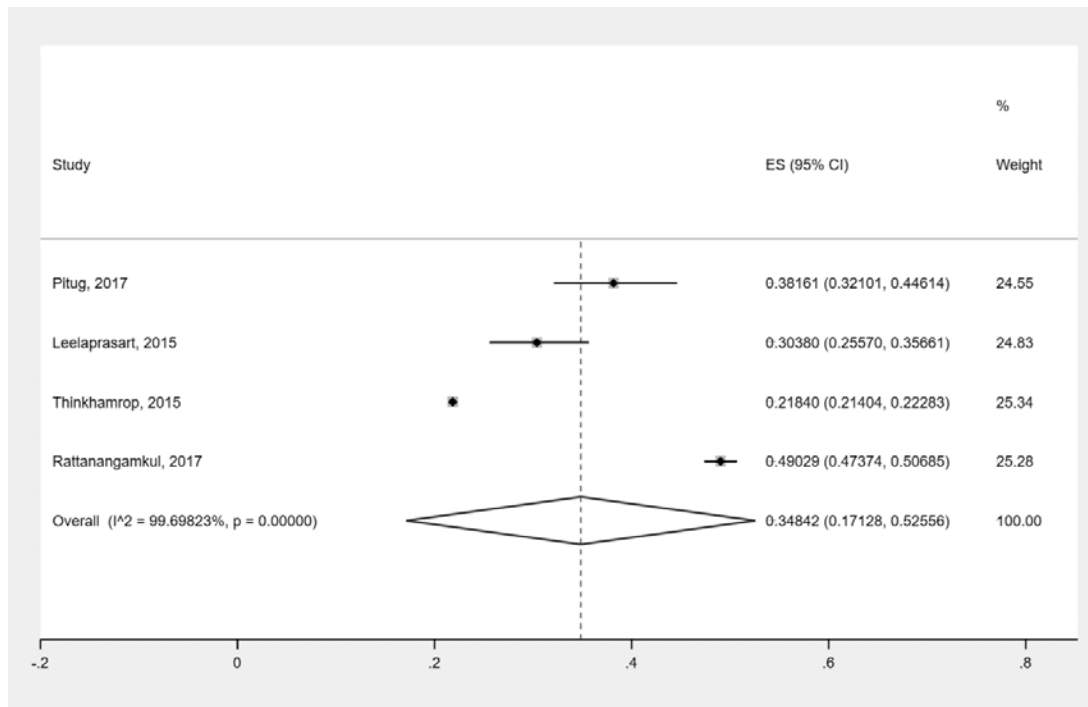

**Figure S3** Prevalence of NAFLD in Thai general population aged 40–59 years  
ES, effect size; NAFLD, non-alcoholic fatty liver disease

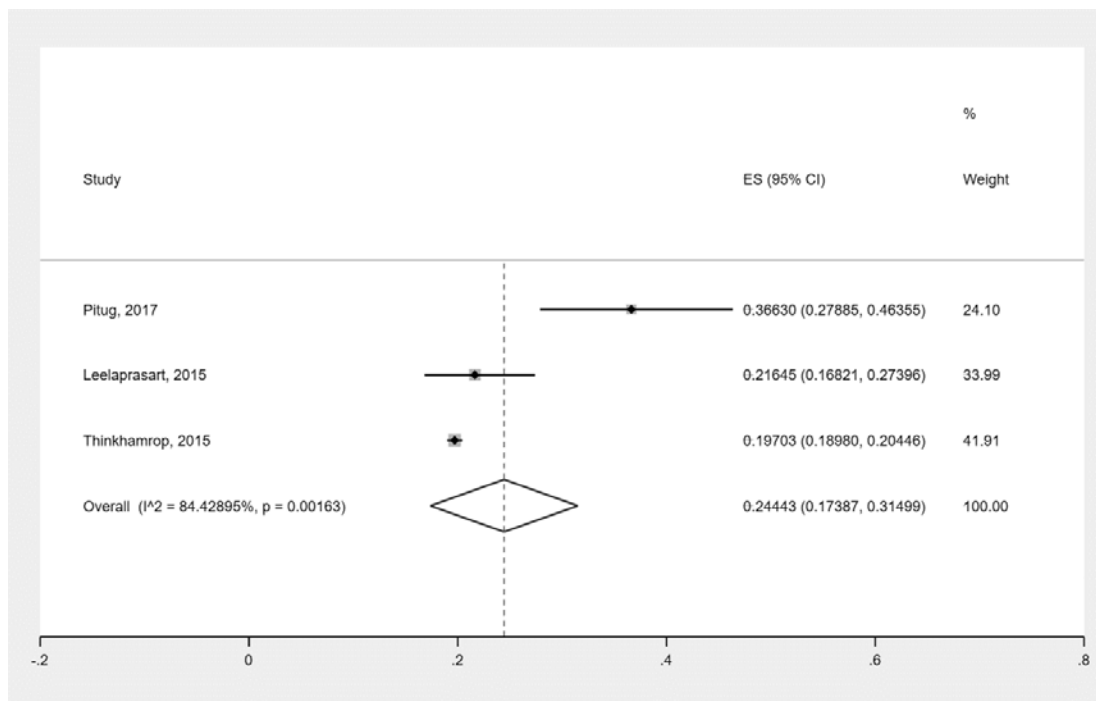

**Figure S4** Prevalence of NAFLD in Thai general population aged 60 years and over  
ES, effect size; NAFLD, non-alcoholic fatty liver disease



#### **Appendix 4: Prevalence of non-alcoholic steatohepatitis with significant fibrosis in Thailand**

The prevalences of non-alcoholic steatohepatitis with significant fibrosis and first detected fibrosis stages among NAFLD patients in Thailand were limited. Thus, we had to calculate them based on the original data of two published cohort studies conducted on Thai patients.

First, the study conducted by Treeprasertsuk *et al.* [15] investigated the accuracy of noninvasive scoring systems by assessing advanced liver fibrosis in Thai adult patients with NAFLD. All patients (139 in this article and 160 additional cases) underwent a liver biopsy to define their histological liver fibrosis stages. Although most of the participants were obese, which means they are unable to represent the normal population, some had a lower BMI. Consequently, we assumed that the patients whose BMI was less than 23 kg/m<sup>2</sup> were considered normal population.

Second, the cohort study of Saokaew *et al.* [16]—which aimed to develop a simple risk scoring method to predict NAFLD in patients with metabolic syndrome—is of interest. It was conducted on 509 Thai patients. We obtained additional raw data from the research team of the participants who were later diagnosed with transient elastography (FibroScan); we classified the patients into their proper fibrosis stages using the cutoff values according to the study of Lee *et al.* [17].

From those two studies, the original data were pooled and calculated as the prevalence of NASH and the first detected fibrosis stages among NAFLD, as shown in Table S5, before being applied in the economic burden analysis.

**Table S5** Prevalence of non-alcoholic steatohepatitis with significant fibrosis and first detected fibrosis stages among non-alcoholic fatty liver patients, classified by age group

| Age group<br>(years) | Prevalence (standard error) |                  |                  |                  |                  |                                         |
|----------------------|-----------------------------|------------------|------------------|------------------|------------------|-----------------------------------------|
|                      | F0                          | F1               | F2               | F3               | F4/CC            | NASH<br>with<br>significant<br>fibrosis |
| 18-29                | 0.500<br>(0.065)            | 0.317<br>(0.060) | 0.133<br>(0.044) | 0.050<br>(0.003) | 0.000<br>(0.000) | 0.183<br>(0.009)                        |
| 30-39                | 0.539<br>(0.057)            | 0.237<br>(0.049) | 0.171<br>(0.043) | 0.039<br>(0.002) | 0.013<br>(0.001) | 0.224<br>(0.011)                        |
| 40-49                | 0.551<br>(0.053)            | 0.281<br>(0.048) | 0.101<br>(0.032) | 0.056<br>(0.003) | 0.011<br>(0.001) | 0.169<br>(0.009)                        |
| 50-59                | 0.653<br>(0.032)            | 0.183<br>(0.026) | 0.082<br>(0.019) | 0.073<br>(0.018) | 0.009<br>(0.000) | 0.164<br>(0.008)                        |
| 60-69                | 0.770<br>(0.030)            | 0.079<br>(0.019) | 0.042<br>(0.014) | 0.016<br>(0.001) | 0.094<br>(0.021) | 0.152<br>(0.008)                        |
| ≥ 70                 | 0.850<br>(0.036)            | 0.060<br>(0.024) | 0.030<br>(0.002) | 0.010<br>(0.001) | 0.050<br>(0.003) | 0.090<br>(0.005)                        |

F0, fibrosis stage 0; F1, fibrosis stage 1; F2, fibrosis stage 2; F3, fibrosis stage 3; F4/CC, fibrosis stage 4/compensated cirrhosis; HCC, hepatocellular carcinoma; LT, liver transplantation; post-LT, post liver transplantation NASH, non-alcoholic steatohepatitis

### Appendix 5: Estimated number of patients in advanced health state

**Table S6** Estimated number of patients in advanced health states for each year in cohort simulation

| Age | Estimated number of patients |        |         |    |
|-----|------------------------------|--------|---------|----|
|     | F4/CC                        | DC     | New HCC | LT |
| 18  | 0                            | 0      | 0       | 0  |
| 19  | 319357                       | 0      | 0       | 0  |
| 20  | 308079                       | 19150  | 0       | 0  |
| 21  | 295405                       | 35730  | 9814    | 21 |
| 22  | 280653                       | 50109  | 9932    | 34 |
| 23  | 264083                       | 62469  | 9921    | 44 |
| 24  | 246268                       | 72939  | 9795    | 50 |
| 25  | 227812                       | 81617  | 9574    | 54 |
| 26  | 209251                       | 88599  | 9281    | 57 |
| 27  | 191027                       | 94000  | 8934    | 59 |
| 28  | 173459                       | 97931  | 8550    | 60 |
| 29  | 156765                       | 100548 | 8141    | 61 |
| 30  | 141093                       | 101986 | 7718    | 60 |
| 31  | 126523                       | 102374 | 7292    | 60 |
| 32  | 113092                       | 101847 | 6866    | 58 |
| 33  | 100790                       | 100518 | 6448    | 57 |
| 34  | 89574                        | 98533  | 6039    | 55 |
| 35  | 79407                        | 96006  | 5643    | 53 |
| 36  | 70229                        | 93031  | 5262    | 51 |
| 37  | 61980                        | 89700  | 4898    | 49 |
| 38  | 54589                        | 86081  | 4550    | 46 |
| 39  | 47988                        | 82290  | 4220    | 44 |
| 40  | 42108                        | 78371  | 3908    | 41 |
| 41  | 36883                        | 74367  | 3614    | 39 |
| 42  | 32253                        | 70321  | 3337    | 37 |
| 43  | 28156                        | 66264  | 3077    | 34 |
| 44  | 24536                        | 62252  | 2832    | 32 |
| 45  | 21346                        | 58302  | 2604    | 30 |
| 46  | 18540                        | 54436  | 2389    | 28 |
| 47  | 16077                        | 50672  | 2189    | 26 |
| 48  | 13919                        | 47023  | 2002    | 24 |
| 49  | 12030                        | 43503  | 1828    | 22 |
| 50  | 10381                        | 40124  | 1666    | 21 |
| 51  | 8943                         | 36896  | 1515    | 19 |
| 52  | 7693                         | 33826  | 1375    | 17 |
| 53  | 6606                         | 30915  | 1245    | 16 |
| 54  | 5664                         | 28164  | 1126    | 14 |
| 55  | 4847                         | 25571  | 1015    | 13 |
| 56  | 4141                         | 23141  | 912     | 12 |
| 57  | 3531                         | 20873  | 818     | 11 |
| 58  | 3005                         | 18757  | 732     | 10 |
| 59  | 2552                         | 16790  | 653     | 9  |
| 60  | 2162                         | 14965  | 580     | 8  |
| 61  | 1827                         | 13285  | 514     | 7  |
| 62  | 1540                         | 11743  | 453     | 6  |
| 63  | 1295                         | 10330  | 398     | 5  |

| Age | Estimated number of patients |      |         |    |
|-----|------------------------------|------|---------|----|
|     | F4/CC                        | DC   | New HCC | LT |
| 64  | 1086                         | 9040 | 349     | 5  |
| 65  | 907                          | 7864 | 304     | 4  |
| 66  | 755                          | 6805 | 263     | 4  |
| 67  | 627                          | 5856 | 227     | 3  |
| 68  | 518                          | 5006 | 194     | 3  |
| 69  | 427                          | 4249 | 166     | 2  |
| 70  | 350                          | 3575 | 140     | 2  |
| 71  | 286                          | 2987 | 118     | 2  |
| 72  | 232                          | 2476 | 98      | 1  |
| 73  | 188                          | 2033 | 81      | 1  |
| 74  | 151                          | 1650 | 67      | 1  |
| 75  | 121                          | 1319 | 54      | 1  |
| 76  | 96                           | 1044 | 43      | 1  |
| 77  | 76                           | 816  | 34      | 1  |
| 78  | 59                           | 628  | 27      | 0  |
| 79  | 46                           | 472  | 21      | 0  |
| 80  | 35                           | 344  | 16      | 0  |
| 81  | 27                           | 247  | 11      | 0  |
| 82  | 20                           | 174  | 8       | 0  |
| 83  | 15                           | 119  | 6       | 0  |
| 84  | 11                           | 77   | 4       | 0  |
| 85  | 8                            | 47   | 3       | 0  |
| 86  | 6                            | 28   | 2       | 0  |
| 87  | 4                            | 17   | 1       | 0  |
| 88  | 3                            | 10   | 1       | 0  |
| 89  | 2                            | 6    | 0       | 0  |
| 90  | 1                            | 4    | 0       | 0  |
| 91  | 1                            | 2    | 0       | 0  |
| 92  | 1                            | 1    | 0       | 0  |
| 93  | 0                            | 1    | 0       | 0  |
| 94  | 0                            | 1    | 0       | 0  |
| 95  | 0                            | 0    | 0       | 0  |
| 96  | 0                            | 0    | 0       | 0  |
| 97  | 0                            | 0    | 0       | 0  |
| 98  | 0                            | 0    | 0       | 0  |
| 99  | 0                            | 0    | 0       | 0  |
| 100 | 0                            | 0    | 0       | 0  |

DC, decompensated cirrhosis; F4/CC, fibrosis stage 4/compensated cirrhosis; HCC, hepatocellular carcinoma; LT, liver transplantation

## Appendix 6: The proportion of total costs by health state

**Table S7** The proportion of total costs by health state

| Health states | Average cases per year <sup>a</sup> | Average cost per case (\$) <sup>b</sup> | Total cost per year (number of cases × average cost per case) (\$) <sup>b</sup> | Discounted lifetime cost <sup>c</sup> (\$) <sup>b</sup> |
|---------------|-------------------------------------|-----------------------------------------|---------------------------------------------------------------------------------|---------------------------------------------------------|
| NASH with F2  | 204,674                             | 89                                      | 18,215,986                                                                      | 888,400,651                                             |
| NASH with F3  | 122,299                             | 89                                      | 10,884,611                                                                      | 516,034,475                                             |
| NASH with F4  | 65,649                              | 2,121                                   | 139,241,529                                                                     | 6,352,128,109                                           |
| DC            | 45,536                              | 3,916                                   | 178,318,976                                                                     | 6,105,564,085                                           |
| HCC           | 7,244                               | 4,873                                   | 35,300,012                                                                      | 1,346,338,807                                           |
| LT            | 26                                  | 18,018                                  | 468,468                                                                         | 16,106,449                                              |
| post-LT       | 280                                 | 2,908                                   | 814,240                                                                         | 20,778,926                                              |
| Total         | 445,708                             | -                                       | 383,243,822                                                                     | 15,245,351,503                                          |

DC, decompensated cirrhosis; F2, fibrosis stage 2; F3, fibrosis stage 3; F4, fibrosis stage 4; HCC, hepatocellular carcinoma; LT, liver transplantation; post-LT, post liver transplantation

<sup>a</sup>Average cases per year in population age 18-77 years (life expectancy of Thai population = 77 years [18])

<sup>b</sup>All cost presented in 2019 US Dollars

<sup>c</sup>Considered the dynamic of the disease and applied 3% annual discount rate

## **Appendix 7: Probabilistic sensitivity analysis**

We performed a 2-step multivariate probabilistic sensitivity analysis (PSA) with 1,000 Monte Carlo simulations, each, by using Microsoft Excel 2019 (Microsoft Corp, Redmond, WA, USA) in order to explore the uncertainties of parameters and to examine the robustness of our model [19].

The first PSA was performed by varying all variables simultaneously, based on the appropriate distribution assigned to each variable, to obtain the minimum and maximum values of each variable. The transitional probabilities were assigned beta distribution. All cost data were assigned gamma distribution. Hazard ratios were assigned log-normal distribution [20]. Then, clinically significant variables were selected, based on expert opinion, to undergo the latter step of PSA. Eight variables were selected: 1) prevalence of NAFLD, 2) incidence of NAFLD, 3) incidence of NASH with significant fibrosis, 4) prevalence of first detected fibrosis stage among NAFLD patients, 5) probability of death of HCC, 6) hazard ratios of mortality rate of NAFLD, 7) hazard ratios of mortality rate of cirrhosis patients, and 8) cost of NASH with significant fibrosis.

The second PSA was performed using the ranges (maximum–minimum) obtained from the first PSA. Only the 8 selected variables were varied, while the others were fixed. Then, the minimum and maximum economic burdens for each age group were acquired, as shown in Figures S4. The upper and lower ends of the lines signify the minimum and maximum costs, while the upper and lower edges of the boxes represent the 25<sup>th</sup> and 75<sup>th</sup> percentiles of the cost ranges. The middle horizontal lines in the boxes are the median costs and the filled circles are the outliers.

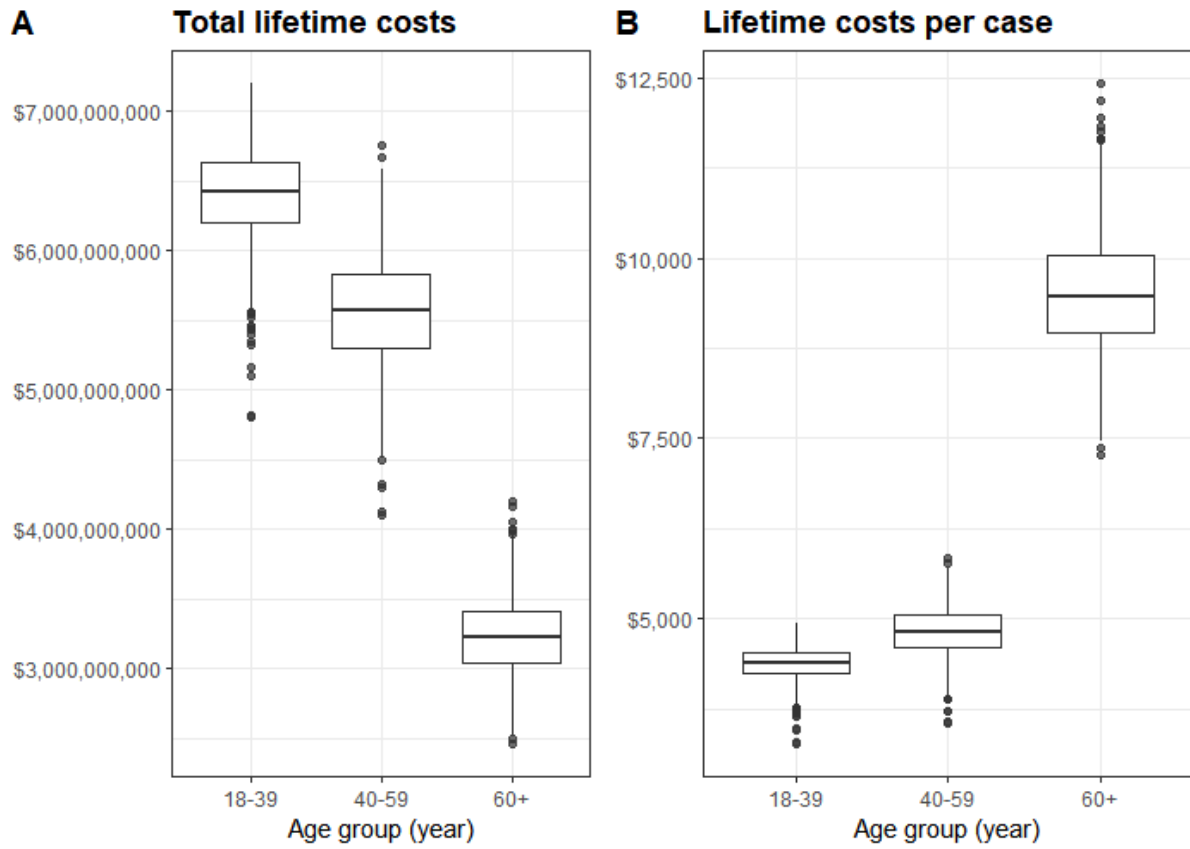

**Figure S5** Probabilistic sensitivity analysis (PSA) represented by box plots showing the median, 25<sup>th</sup> percentile, 75<sup>th</sup> percentile, and outlier cost (\$) of NASH with significant fibrosis of each age group (A) total lifetime costs (B) lifetime costs per case

## References

1. Official statistics registration systems. Population Statistics. <https://stat.bora.dopa.go.th/download/list.php>. Accessed 6 Dec 2019.
2. World Health Organization. Life tables:Thailand. <https://apps.who.int/gho/data/node.country.country-THA?lang-en>. Accessed 20 Dec 2019.
3. Ekstedt M, Hagström H, Nasr P, Fredrikson M, Stål P, Kechagias S, Hulcrantz R. Fibrosis stage is the strongest predictor for disease-specific mortality in NAFLD after up to 33 years of follow-up. *Hepatology*. 2015; 61(5):1547-54.
4. Udompornmongkol C. The factors that associated with non-alcoholic fatty liver in patient undergo screening ultrasound in Detudom Royal Crown Prince Hospital, Detudom district, Ubon Rachathani province. *Journal of Medicine and Public Health, Ubon Ratchathani University*. 2019; 2(3):182-92.
5. Vanduangden K. Prevalence of nonalcoholic fatty liver disease (NAFLD) diagnosed by controlled attenuation parameter with transient elastography in subjects with and without metabolic syndrome. *Chula Med J*. 2017; 61(4):483-95.
6. Ekpanyapong S, Bunchorntavakul C, Techasirioangkun T, Napativaumnuay N. Prevalence and risk factors of non-alcoholic fatty liver disease in type 2 diabetes mellitus patients with normal serum aminotransferase levels. *J Med Assoc Thai*. 2018; 101(4):S93-S103.
7. Sobhonslidsuk A, Pulsombat A, Kaewdoug P, Petraksa S. Non-alcoholic fatty liver disease (NAFLD) and significant hepatic fibrosis defined by non-invasive assessment in patients with type 2 diabetes. *Asian Pac J Cancer Prev*. 2015; 16(5):1789-94.
8. Phisalprapa P, Ujjan A, Apisarnthanarak P, Charoensak A, Washirasaksiri C, Srivanichakorn W, Pandejpong D, Charatcharoenwitthaya P. Sa1050 Prevalence and Risk Factors of Non-Alcoholic Fatty Liver Disease in Asian Individuals With Metabolic Syndrome. *Gastroenterology*. 2014; 146(5):S-947.
9. Summart U, Thinkhamrop B, Chamadol N, Khuntikeo N, Songthamwat M, Kim CS. Gender differences in the prevalence of nonalcoholic fatty liver disease in the Northeast of Thailand: A population-based cross-sectional study. *F1000Res*. 2017; 6.
10. Thinkhamrop K, Khuntikeo N, Phonjitt P, Chamadol N, Thinkhamrop B, Moore MA, Promthet S. Association between diabetes mellitus and fatty liver based on ultrasonography screening in the world's highest cholangiocarcinoma incidence region, Northeast Thailand. *Asian Pac J Cancer Prev*. 2015; 16(9):3931-6.
11. Pitug B. Prevalence of nonalcoholic fatty liver disease ( NAFLD ) and correlation between prevalence of NAFLD and obesity in people living in borabue district , Mahasarakham province. *Mahasarakham hospital journal*. 2017; 14(2):22-8.
12. Leelaprasert S. Prevalence and risk factor of Non alcoholic fatty Liver Disease using abdominal ultrasound in Krabi hospital. *Reg 11 Med J*. 2015; 29(4):597-606.
13. Rattanangamkul M. The relation of non alcoholic fatty liver and metabolic syndrome in Thais. *Durakij Pundit University*; 2017.
14. Tajima R, Imamura F, Kimura T, Kobayashi S, Masuda K, Iida K. Association of alcohol consumption with prevalence of fatty liver after adjustment for dietary patterns: Cross-sectional analysis of Japanese middle-aged adults. *Clin Nutr*. 2020; 39(5):1580-6.
15. Treeprasertsuk S, Piyachaturawat P, Soontornmanokul T, Wisedopas-Klaikaew N, Komolmit P, Tangkijavanich P. Accuracy of noninvasive scoring systems to assess advanced liver fibrosis in Thai patients with nonalcoholic fatty liver disease. *Asian Biomed (Res Rev News)*. 2016; 10(s1):s49-s55.



16. Saokaew S, Kanchanasuwan S, Apisarnthanarak P, Charoensak A, Charatcharoenwitthaya P, Phisalprapa P, Chaiyakunapruk N. Clinical risk scoring for predicting non-alcoholic fatty liver disease in metabolic syndrome patients (NAFLD-MS score). *Liver Int.* 2017; 37(10):1535-43.
17. Lee HW, Park SY, Kim SU, Jang JY, Park H, Kim JK, Lee CK, Chon YE, Han KH. Discrimination of Nonalcoholic Steatohepatitis Using Transient Elastography in Patients with Nonalcoholic Fatty Liver Disease. *PLoS One.* 2016; 11(6):e0157358.
18. The World Bank. Life expectancy at birth, total (years) - Thailand. <https://data.worldbank.org/indicator/SP.DYN.LE00.IN?locations=TH>. Accessed 31 Jan 2020.
19. Briggs A, Sculpher M, Claxton K. *Decision Modelling for Health Economic Evaluation*: OUP Oxford; 2006.
20. Limwattananon S. Handling uncertainty of the economic evaluation result: sensitivity analysis. *J Med Assoc Thai.* 2011; 91(6):59.
